# Supplementary material for: The integration of Gaussian noise by long-range amygdala inputs in frontal circuit promotes fear learning in mice
Source: eLife. 2020 Nov 30;9:e62594. doi: 10.7554/eLife.62594 (PMC7704104; doi:10.7554/eLife.62594)
Supplement: Figure 1—figure supplement 1—source data 1. [file elife-62594-fig1-figsupp1-data1.xlsx]

## Sheet: Sup Figures
fig.	variable /units	group	cells	mean	Std dev	median	0.25	0.75	test	p -value
E	cVm change (mV) (end of stimulation)	WGN 90dB	6	64.112	13.884	64.903	55.041	75.386	two way anova repeated measures with multiple comparisons (Holm-Sidak method)	p<0.001 (interaction)
		chirp 90dB	6	41.236	16.311	41.05	28.571	56.266		p=0.004 (90dB, WGN vs chirp); p<0.001 (90dB, WGN vs pure); p<0.001 (90dB, chirp vs pure)
		pure 90dB	6	-1.233	8.543	-1.748	-4.981	3.875
		WGN 80dB	6	30.666	11.462	25.636	22.402	42.361		p=0.042 (80dB, WGN vs chirp); p<0.001 (80dB, WGN vs pure); p<0.001 (80dB, chirp vs pure)
		chirp 80dB	6	18.778	11.565	20.38	12.163	28.003
		pure 80dB	6	-4.682	6.181	-1.47	-10.319	-0.435
		WGN 60dB	6	25.143	12.76	20.548	16.867	33.418		p=0.025 (60dB, WGN vs chirp); p<0.001 (60dB, WGN vs pure); p=0.046 (60dB, chirp vs pure)
		chirp 60dB	6	11.192	12.204	13.137	1.054	21.33
		pure 60dB	6	-1.02	8.074	-0.148	-7.626	5.587
