# Supplementary material for: The integration of Gaussian noise by long-range amygdala inputs in frontal circuit promotes fear learning in mice
Source: eLife. 2020 Nov 30;9:e62594. doi: 10.7554/eLife.62594 (PMC7704104; doi:10.7554/eLife.62594)
Supplement: Figure 1—figure supplement 2—source data 1. [file elife-62594-fig1-figsupp2-data1.xlsx]

## Sheet: Sup Figures
fig.	variable /units	group	cells	mean	Std dev	median	0.25	0.75	test	p -value
E	FFT magnitude (V)	ctrl	22			5.452	2.97	9.07	Mann-Whitney rank sum test	p=0.048
	0.5-2Hz	dAP5	19			3.26	2.65	3.92
F	spontaneaous 30s-cumulative	ctrl	22			110.39	52.3	148	Mann-Whitney rank sum test	p=0.007
	potential (mV)	dAP5	19			51.515	48.8	61.2
H	cVm change (Vm)	ctrl	5	21.8	9.858				paired t-test	p=0.001
	WGN	dAP5	5	-11.3	6.652
	cVm change (Vm)	ctrl	5	-6.81	12.19				paired t-test	p=0.046
	WGN	dAP5	5	-16.5	7.741
I	NMDARs component	WGN	5	33.12	9.404				paired t-test	p=0.017
	(mV)	dAP5	5	9.695	7.562
