# Supplementary material for: The integration of Gaussian noise by long-range amygdala inputs in frontal circuit promotes fear learning in mice
Source: eLife. 2020 Nov 30;9:e62594. doi: 10.7554/eLife.62594 (PMC7704104; doi:10.7554/eLife.62594)
Supplement: Figure 1—source data 1. [file elife-62594-fig1-data1.xlsx]

## Sheet: Figure 1
fig.	variable /units	group	cells	mean	Std dev	median	0.25	0.75	test	p -value		WGN cVm change (mV) (time point 1)				WGN cVm change (mV) (time point 2)
1D	WGN cVm change (mV) (time point 1)	control	22	27.62	19.741	25.888	16.198	36.288	One way anova with multiple comparisons (Holm-Sidak method)	p<0.001		control	dAP5	iMK801		control	dAP5	iMK801
		dAP5	14	-13.4	17.589	-11.542	-18.039	-4.624		p<0.001 (control vs dAP5)		69.3795	-7.6974	-1.4849		76.6495	-2.2172	-48.638
		iMK801	5	-2.24	5.368	-1.66	-6.786	0.387		p=0.002 (control vs iMK801)		41.4969	-9.9256	-7.5208		84.9051	-17.94	-0.2629
	WGN cVm change (mV) (time point 2)	control	22	32.53	26.596	25.653	14.3	41.2	Kruskal-Wallis one way anova with multiple comparisons (Dunn's method)	p<0.001		36.2881	7.244	-6.5412		37.6701	-0.9279	-5.0809
		dAP5	14	-8.25	15.985	-13.74	-19	-0.93		p<0.05 (control vs dAP5)		18.3913	-8.036	6.0043		11.2875	-21.1962	13.8345
		iMK801	5	-7.669	23.938	-0.263	-16	4.81		p<0.05 (control vs iMK801)		16.1982	-13.1581	-1.6595		5.5054	-18.3133	1.8042
1F	8kHz cVm change (mV) (time point 1)	control	22	1.16	18.145	1.748	-13.366	11.659	One way anova with multiple comparisons (Holm-Sidak method)	p=0.004		24.6195	-17.861			24.4783	-18.8271
		dAP5	10	-16.8	12.998	-16.748	-26.821	-8.135		p=0.006 (control vs dAP5)		30.2708	-16.2599			7.0316	-18.3746
		iMK801	5	-21	7.657	-18.844	-28.631	-14.794		p=0.008 (control vs iMK801)		2.4411	-34.5569			14.2728	-29.6276
	8kHz cVm change (mV) (time point 2)	control	22	-3.82	14.122	-4.156	-12.608	4.342	One way anova with multiple comparisons (Holm-Sidak method)	p=0.016		24.4937	7.8212			27.6006	-9.5315
		dAP5	10	-15.4	15.447	-18.102	-31.032	-5.148		p=0.012 (control vs dAP5)		30.9861	-51.4093			24.1542	-21.0377
		iMK801	5	-22.7	12.508	-18.448	-28.306	-15.612		p=0.041 (control vs iMK801)		12.5652	-4.6238			21.7572	28.0573
												36.3062	12.0561			41.2422	16.1838
												22.8225	-18.0387			2.115	1.1739
												31.0692	-33.5271			26.5534	-2.9177
												77.1716				54.8064
												24.5204				24.7516
												46.3506				18.261
												14.5478				48.742
												27.1626				28.896
												1.3881				99.6739
												-8.0635				-0.7012
												27.1572				36.0117
												8kHz cVm change (mV) (time point 1)				8kHz cVm change (mV) (time point 2)
												control	dAP5	iMK801		control	dAP5	iMK801
												33.7201	-10.8377	-29.8033		12.7499	-16.1561	-43.5825
												24.2483	7.008	-18.8437		20.3675	-5.4234	-23.214
												-0.0276	-33.5783	-28.2403		4.3417	-35.2902	-10.8149
												4.7287	-6.7639	-15.5107		-9.2482	-5.1484	-18.4483
												20.0478	-9.5506	-12.6434		10.6065	-20.0472	-17.2108
												32.5551	-26.8207			2.4874	9.0122
												11.6587	-22.6591			-6.322	-22.6624
												-4.1311	-25.6737			13.7468	-31.0316
												-13.3656	-30.7544			3.8515	-31.3385
												6.5423	-8.1354			11.6662	4.0411
												-19.6592				-12.6075
												6.8711				-4.9965
												3.5226				3.8243
												10.6045				-18.4978
												19.25				-4.8516
												-4.0049				-3.4599
												-16.5082				-31.3138
												-17.0269				-19.9124
												-8.9484				-5.0217
												-17.5288				-23.6861
												-10.0979				-28.098
												-36.9208				0.2635
