# Supplementary material for: The integration of Gaussian noise by long-range amygdala inputs in frontal circuit promotes fear learning in mice
Source: eLife. 2020 Nov 30;9:e62594. doi: 10.7554/eLife.62594 (PMC7704104; doi:10.7554/eLife.62594)
Supplement: Figure 2—figure supplement 1—source data 1. [file elife-62594-fig2-figsupp1-data1.xlsx]

## Sheet: Sup Figures
fig.	variable /units	group	mice	mean	Std dev	test	p -value
C	number of local events per dendrites during tone presentation (30sec, awake)	baseline	9	0.54	0.38	One way anova repeated measures with multiple comparisons (Holm-Sidak method)	p<0.001
		WGN	9	3.193	1.005		p<0.001 (WGN vs baseline)
		8kHz	9	2.484	0.567		p=0.031 (WGN vs 8kHz)
		2kHz	9	1.999	0.715		p<0.001 (WGN vs 2kHz)
							p<0.001 (8kHz vs baseline)
							p<0.001 (2kHz vs baseline)
							p=0.128 (8kHz vs 2kHz)
	number of global events per dendrites during tone presentation (30sec, awake)	WGN	9	0.881	0.61	One way anova repeated measures	p=0.739
		8kHz	9	0.786	0.469
		2kHz	9	0.882	0.813
D	number of local events per dendrites during tone presentation (30sec, anaesthesia)	baseline	5	1.664	0.394	One way anova repeated measures with multiple comparisons (Holm-Sidak method)	p<0.001
		WGN	5	3.282	0.864		p<0.001 (WGN vs baseline)
		8kHz	5	1.19	0.813		p<0.001 (WGN vs 8kHz)
		2kHz	5	1.261	0.52		p<0.001 (WGN vs 2kHz)
							p=0.056 (8kHz vs baseline)
							p=0.097 (2kHz vs baseline)
							p=0.789 (8kHz vs 2kHz)
	number of global events per dendrites during tone presentation (30sec, anaesthesia)	WGN	5	0.012	0.0258	One way anova repeated measures	p=0.533
		8kHz	5	0.019	0.0333
		2kHz	5	0.039	0.0544
