# Supplementary material for: The integration of Gaussian noise by long-range amygdala inputs in frontal circuit promotes fear learning in mice
Source: eLife. 2020 Nov 30;9:e62594. doi: 10.7554/eLife.62594 (PMC7704104; doi:10.7554/eLife.62594)
Supplement: Figure 2—figure supplement 2—source data 1. [file elife-62594-fig2-figsupp2-data1.xlsx]

## Sheet: Sup Figures
fig.	variable /units	group	mice	mean	Std dev	median	0.25	0.75	test	p -value
B	distance (cm)	total-WGN	17	424.2	178.65	397	301	526	one-way anova on ranks	p<0.001
		total-8kHz	17	487.6	156.48	454.5	382	518	repeated measures	p>0.05 (WGN vs 8kHz total)
		in-WGN	17	214	82.676	210	168	246	with multiple comparisons	p>0.05 (WGN vs 8kHz outer)
		in-8kHz	17	240.1	111.59	215.5	159	324	(Tukey method)	p>0.05 (WGN vs 8kHz inner)
		out-WGN	17	153.1	65.353	136.5	96.5	220
		out-8kHz	17	201.1	77.608	182.5	141	249
C	stop (%)	WGN	17	6.676	5.312				paired t-test	p=0.362
	% of tone duration	8kHz	17	4.975	4.813
