# Supplementary material for: The integration of Gaussian noise by long-range amygdala inputs in frontal circuit promotes fear learning in mice
Source: eLife. 2020 Nov 30;9:e62594. doi: 10.7554/eLife.62594 (PMC7704104; doi:10.7554/eLife.62594)
Supplement: Figure 2—source data 1. [file elife-62594-fig2-data1.xlsx]

## Sheet: Main Figures
fig.	variable /units	group	mice	mean	Std dev	median	0.25	0.75	test	p -value		number of calcium events per dendrites during isoflurane anesthesia (mice averaged)
2D	number of calcium events per dendrites during isoflurane anesthesia (during tone presentation, 30 sec)	baseline	5	1.664	0.394	1.8	1.438	1.942	One way anova repeated measures with multiple comparisons (Holm-Sidak method)	p<0.001
		WGN	5	3.282	0.864	3.4	2.652	3.764		p<0.001 (WGN vs baseline)		baseline	WGN	8kHz	2kHz
		8kHz	5	1.19	0.813	0.962	0.558	1.675		p<0.001 (WGN vs 8kHz)		1.5769	3.5192	0.5192	0.9808
		2kHz	5	1.261	0.52	1.192	0.894	1.625		p<0.001 (WGN vs 2kHz)		1.0204	2.1837	0.5714	0.6327
										p=0.056 (8kHz vs baseline)		1.9231	2.8077	0.9615	1.1923
										p=0.097 (2kHz vs baseline)		1.8	3.4	1.4	1.5
										p=0.789 (8kHz vs 2kHz)		2	4.5	2.5	2
2F	number of local calcium events per dendrites during wakefulness (during tone presentation, 30 sec)	baseline	9	0.5908	0.38	0.722	0.288	0.944	One way anova repeated measures with multiple comparisons (Holm-Sidak method)	p<0.001
		WGN	9	3.3712	1.005	3.429	2.788	3.992		p<0.001 (WGN vs baseline)		amplitude of calcium events per dendrites during isoflurane anesthesia (mice averaged)
		8kHz	9	2.497	0.567	2.556	2.208	2.7		p=0.031 (WGN vs 8kHz)
		2kHz	9	2.0431	0.715	2	1.546	2.458		p<0.001 (WGN vs 2kHz)		baseline	WGN	8kHz	2kHz
										p<0.001 (8kHz vs baseline)		0.5601	0.5839	1.0666	0.5562
										p<0.001 (2kHz vs baseline)		0.626	0.6636	0.5502	0.5461
										p=0.128 (8kHz vs 2kHz)		1.1909	0.9001	1.1276	1.0099
2I	number of calcium events per dendrites ; anesthesia vs awake (pure tones pooled together)	WGN anesthesia	5	3.282	0.864	3.4	2.652	3.764	Two way anova repeated measures with multiple comparisons (Holm-Sidak method)	p=0.026		0.7873	0.557	0.65	0.611
		WGN awake	9	3.193	1.005	3.429	2.788	3.992		p=0.844 (WGN, anesthesia vs awake)		1.6494	1.7172	1.6669	1.6485
		pure anesthesia	5	1.226	0.659	1.077	0.713	1.65		p=0.037 (pure tone, anesthesia vs awake)
		pure awake	9	2.241	0.5117	2.042	1.979	2.694				number of calcium events per dendrites during isoflurane wakefulness (mice averaged)
												baseline	WGN	8kHz	2kHz
												1	4.8	2.6	2.4
												0.9533	3.1667	2.5556	3.2222
												0.75	1.625	2.2917	1.625
												0.3846	2.1538	1.6923	1.3077
												0.9444	4.9444	2.555	2.4444
												0.5723	3.4286	3	1
												0.7222	3.7222	2.2778	1.8889
												0	3.5	3.5	2.5
												0	3	2	2
												amplitude of calcium events per dendrites during isoflurane wakefulness (mice averaged)
												baseline	WGN	8kHz	2kHz
												7.689	9.1638	6.8809	12.3192
												2.6243	4.8777	4.4909	5.0783
												7.5268	11.0311	6.2124	6.9337
												5.0041	3.8199	5.0604	6.1252
												16.4997	11.4298	11.098	11.8038
												11.972	9.5086	6.773	5.933
												6.9193	7.6406	6.6058	7.8495
												--	16.9286	6.4884	3.0623
												--	16.1353	13.3482	14.9499
