# Supplementary material for: The integration of Gaussian noise by long-range amygdala inputs in frontal circuit promotes fear learning in mice
Source: eLife. 2020 Nov 30;9:e62594. doi: 10.7554/eLife.62594 (PMC7704104; doi:10.7554/eLife.62594)
Supplement: Figure 3—figure supplement 2—source data 1. [file elife-62594-fig3-figsupp2-data1.xlsx]

## Sheet: Sup Figures
fig.	variable /units	group	mice	mean	Std dev	median	0.25	0.75	test	p -value
E	local events	Baseline-	8	0.54	0.38	0.647	0.19	0.85	t-test	p=0.496
	per dendrites	Baseline+	5	0.397	0.308	0.5	0.13	0.59	Mann-Whitney rank sum test	p=0.524
	awake	WGN-	8	3.193	1.005	3.298	2.58	3.61	t-test	p=0.025
	(number)	WGN+	5	1.882	0.623	2.176	1.38	2.27	Mann-Whitney rank sum test	p=0.045
	naive(-) vs FC(+)	8 kHz-	8	2.497	0.532	2.556	2.21	2.7	t-test	p=0.360
		8 kHz+	5	2.145	0.866	2.412	1.81	2.58	Mann-Whitney rank sum test	p=0.548
		2 kHz-	8	2.043	0.682	2	1.55	2.46	t-test	p=0.544
		2 kHz+	5	1.796	0.762	1.935	1.43	2.18	Mann-Whitney rank sum test	p=0.739
G	Global events	Baseline-	8	0.377	0.283	0.4	0.13	0.48	t-test	p=0.712
	per dendrites	Baseline+	5	0.317	0.326	0.167	0.09	0.52	Mann-Whitney rank sum test	p=0.734
	awake	WGN-	8	0.819	0.583	0.75	0.27	1.33	t-test	p=0.411
	(number)	WGN+	5	1.108	0.741	1.294	0.45	1.51	Mann-Whitney rank sum test	p=0.65
	naive(-) vs FC(+)	8 kHz-	8	0.729	0.461	0.786	0.32	0.94	t-test	p=0.113
		8 kHz+	5	1.143	0.837	0.765	0.55	1.8	Mann-Whitney rank sum test	p=0.571
		2 kHz-	8	0.826	0.75	0.833	0.24	1.07	t-test	p=0.968
		2 kHz+	5	0.811	0.507	0.824	0.41	1.14	Mann-Whitney rank sum test	p=0.910
