# Supplementary material for: The integration of Gaussian noise by long-range amygdala inputs in frontal circuit promotes fear learning in mice
Source: eLife. 2020 Nov 30;9:e62594. doi: 10.7554/eLife.62594 (PMC7704104; doi:10.7554/eLife.62594)
Supplement: Figure 3—figure supplement 3—source data 1. [file elife-62594-fig3-figsupp3-data1.xlsx]

## Sheet: Sup Figures
fig.	variable /units	group	cells	mean	Std dev	test	p -value
C	cVm change (mV)	WGN-	22	27.62	19.741	one-way anova	p<0.001
	time point 1	WGN+	8	1.16	18.145	with multiple comparisons	p=0.008 (upWGN vs npWGN)
	naive(-) vs FC(+)	8kHz-	22	5.407	26.645	(Holm-Sidak method)	p<0.001 (upWGN vs up8kHz)
	protocol 1	8kHz+	8	0.526	14.083		p<0.001 (upWGN vs pp8kHz)
							p=0.601 (npWGN vs up8Khz)
							p=0.620 (npWGN vs pp8Khz)
							p=0.938 (np8kHz vs pp8kHz)
