# Supplementary material for: The integration of Gaussian noise by long-range amygdala inputs in frontal circuit promotes fear learning in mice
Source: eLife. 2020 Nov 30;9:e62594. doi: 10.7554/eLife.62594 (PMC7704104; doi:10.7554/eLife.62594)
Supplement: Figure 3—source data 1. [file elife-62594-fig3-data1.xlsx]

## Sheet: Main Figures
fig.	variable /units	group	mice	mean	Std dev	median	0.25	0.75	test	p -value				habituation		recall					habituation		recall
E	Learning+ (total mice) protocol 1a	GFP+	6(8)						pearson χ² test (χ²=0.4103)	p=0.522		protocol	genotype	CS+	CS-	CS+	CS-		protocol	genotype	CS+	CS-	CS+	CS-
		ArchT+	7(8)									1a	GFP	--	--	24.8333	0.8333		1b	GFP	8.5	5.6667	24.8333	0.8333
	Learning+ (total mice) protocol 2a	GFP+	6(7)						pearson χ² test (χ²=1.3333)	p=0.248		1a	GFP	--	--	25.6667	6.8333		1b	GFP	0.95	2.5667	25.6667	6.8333
		ArchT+	5(7)									1a	GFP	--	--	45.5	15		1b	GFP	1.8833	1.0333	45.5	15
D, top	freezing (%) GFP (protocol 1a) hab=habituation; rec=recall	CS- hab	5	2.1	2.538	1.333	0	3.875	Two way anova repeated measures with multiple comparisons (Holm-Sidak method)	p<0.001 (interaction)		1a	GFP	0	1.3333	25.5	8.1667		1b	GFP	0	1.3333	25.5	8.1667
		CS- rec	5	7.25	7.242	5.25	1.833	11.583		p=0.981 (CS+ hab vs CS- hab)		1a	GFP	1.5	6	82.5	3.6667		1b	GFP	1.5	6	82.5	3.6667
		CS+ hab	8	2.333	1.918	2	1.125	3.542		p<0.001 (CS+ rec vs CS- rec)		1a	GFP	3	0	55	0		1b	GFP	3	0	55	0
		CS+ rec	8	51.208	25.031	50.25	25.583	74.083		p=0.215 (CS- hab vs CS- rec)		1a	GFP	5.1667	0	85	2.8333		1b	GFP	5.1667	0	85	2.8333
										p<0.001 (CS+ hab vs CS+ rec)		1a	GFP	2	3.1667	65.6667	20.6667		1b	GFP	2	3.1667	65.6667	20.6667
	freezing (%) ArchT (protocol 1a) hab=habituation; rec=recall	CS- hab	6	1.944	1.819	1.833	0	3.5	Two way anova repeated measures with multiple comparisons (Holm-Sidak method)	p<0.001 (interaction)									1b	GFP	6.83	8.0917	40.1633	11.3667
		CS- rec	6	4.792	4.332	4.5	1.167	7.333		p=0.972 (CS+ hab vs CS- hab)		1a	ARCHT	--	--	39.1667	12.3333		1b	GFP	9.74	1.7117	19.6633	3.6117
		CS+ hab	8	1.639	0.885	1.75	1.667	2		p<0.001 (CS+ rec vs CS- rec)		1a	ARCHT	--	--	30	0		1b	GFP	0	8.8267	54.3233	3.7533
		CS+ rec	8	46.25	25.041	37.667	28.917	61.75		p=0.567 (CS- hab vs CS- rec)		1a	ARCHT	1.8333	1.8333	36.1667	2.3333		1b	GFP	0	3.74	89.1983	19.4183
										p<0.001 (CS+ hab vs CS+ rec)		1a	ARCHT	0	4.5	18.5	7.5
D, bottom	freezing (%) GFP (protocol 2a) hab=habituation; rec=recall	CS- hab	7	8.462	4.586	8.28	5.381	11.102	Two way anova repeated measures with multiple comparisons (Holm-Sidak method)	p<0.001 (interaction)		1a	ARCHT	1.6667	3.5	94.8333	0		1b	ARCHT	7.3333	1.8333	6.1667	0
		CS- rec	7	2.663	3.107	1.995	0.419	3.35		p=0.799 (CS+ hab vs CS- hab)		1a	ARCHT	2.6667	0	58.3333	7.1667		1b	ARCHT	13.5	6.8333	18	15.6667
		CS+ hab	7	7.471	3.682	6.91	5.358	10.914		p<0.001 (CS+ rec vs CS- rec)		1a	ARCHT	2	1.8333	65.1667	6.6667		1b	ARCHT	3.5	9.8333	7.5	1
		CS+ rec	7	45.37	12.038	41.893	36.089	56.61		p=0.146 (CS- hab vs CS- rec)		1a	ARCHT	1.6667	0	27.8333	2.3333		1b	ARCHT	6.8333	19.3333	28.3333	21.6667
										p<0.001 (CS+ hab vs CS+ rec)									1b	ARCHT	10.1667	0	8.1667	3
	freezing (%) ArchT (protocol 2a) hab=habituation; rec=recall	CS- hab	7	8.862	7.903	7.362	2.315	15.46	Two way anova repeated measures with multiple comparisons (Holm-Sidak method)	p<0.001 (interaction)		2a	GFP	6.91	8.1083	29.195	1.6767		1b	ARCHT	6	2.3333	10.8333	4
		CS- rec	7	2.809	1.752	3.59	1.688	3.796		p=0.509 (CS+ hab vs CS- hab)		2a	GFP	12.1283	8.28	51.5733	9.0583		1b	ARCHT	12	7.5	39.1667	12.3333
		CS+ hab	7	6.142	5.053	7.055	1.826	10.057		p<0.001 (CS+ rec vs CS- rec)		2a	GFP	4.8633	8.8767	61.2433	0		1b	ARCHT	1.8333	1.8333	36.1667	2.3333
		CS+ rec	7	33.339	13.603	37.195	20.135	45.218		p=0.151 (CS- hab vs CS- rec)		2a	GFP	11.9633	11.8433	34.4783	1.995		1b	ARCHT	0	4.5	18.5	7.5
										p<0.001 (CS+ hab vs CS+ rec)		2a	GFP	1.825	4.4717	58.2883	0		1b	ARCHT	7.57	17.86	60.1717	6.555
F	CS+ freezing (%) during recall	GFP 1a	8	51.208	25.031	50.25	25.583	74.083	t-test	p=0.698		2a	GFP	7.765	1.8167	41.8933	3.7433		1b	ARCHT	7.345	2.0133	6.1867	4.125
		ArchT 1a	8	46.25	25.041	37.667	28.9	61.8	rank sum test	p=0.878		2a	GFP	6.8433	15.835	40.9217	2.17		1b	ARCHT	15.5867	9.7867	28.15	7.3333
		GFP 2a	7	45.37	12.038	41.893	36.1	56.6	t-test	p=0.105									1b	ARCHT	14.025	18.5717	49.0183	1.6767
		ArchT 2a	7	33.339	13.603	37.195	20.135	45.218	rank sum test	p=0.128		2a	ARCHT	7.85	12.2517	17.6133	3.6883
I	Learning+ (total mice) protocol 1b	GFP+	9(11)						pearson χ² test (χ²=4.893)	p=0.0270		2a	ARCHT	0	0	14.725	5.1733		2b	GFP	1.5	6	52	4.3333
		ArchT+	4(13)									2a	ARCHT	7.055	2.9683	48.7167	0		2b	GFP	13.3333	21.3333	52.3333	4.4
	Learning+ (total mice) protocol 2b	GFP+	6(7)						pearson χ² test (χ²=0.1169)	p=0.7324		2a	ARCHT	1.7517	2.0967	40.6983	3.8317		2b	GFP	9.5	1.3333	73.3333	11.3333
		ArchT+	10(11)									2a	ARCHT	2.0483	7.3617	27.6983	1.685		2b	GFP	2.5	4.6667	42.8333	10.3333
H, top	freezing (%) GFP (protocol 1b) hab=habituation; rec=recall	CS- hab	12	3.511	3.014	2.867	1.183	5.833	Two way anova repeated measures with multiple comparisons (Holm-Sidak method)	p<0.001 (interaction)		2a	ARCHT	10.7933	20.8267	37.195	1.695		2b	GFP	0	1.8467	30	0
		CS- rec	12	8.013	7.075	5.293	3.222	13.183		p=0.969 (CS+ hab vs CS- hab)		2a	ARCHT	13.495	16.53	46.725	3.59		2b	GFP	6.6617	0	29.3567	6.595
		CS+ hab	12	3.297	3.434	1.942	0.475	5.998		p<0.001 (CS+ rec vs CS- rec)									2b	GFP	3.7717	0	23.9333	0
		CS+ rec	12	51.085	25.147	49.912	25.583	74.083		p=0.410 (CS- hab vs CS- rec)
										p<0.001 (CS+ hab vs CS+ rec)									2b	ARCHT	4.1667	3.1667	70.3333	1.6667
	freezing (%) ArchT (protocol 1b) hab=habituation; rec=recall	CS- hab	13	7.864	6.865	6.833	1.968	11.84	Two way anova repeated measures with multiple comparisons (Holm-Sidak method)	p<0.001 (interaction)									2b	ARCHT	0.8333	1	73	1.5
		CS- rec	13	6.707	6.367	4.125	2.169	8.708		p=0.939 (CS+ hab vs CS- hab)									2b	ARCHT	6.3333	1.1667	52.3333	22
		CS+ hab	13	8.13	4.772	7.345	5.375	12.375		p<0.001 (CS+ rec vs CS- rec)									2b	ARCHT	6.3333	26.3333	31.6667	8
		CS+ rec	13	24.335	17.665	18.5	8	36.917		p=0.742 (CS- hab vs CS- rec)									2b	ARCHT	0.5	2.1667	33.8333	8.6667
										p<0.001 (CS+ hab vs CS+ rec)									2b	ARCHT	1.6667	3.5	61.5	0
H, bottom	freezing (%) GFP (protocol 2b) hab=habituation; rec=recall	CS- hab	7	5.026	7.542	1.847	0.333	5.667	Two way anova repeated measures with multiple comparisons (Holm-Sidak method)	p<0.001 (interaction)									2b	ARCHT	2.6667	0	58.3333	7.1667
		CS- rec	7	5.285	4.497	4.4	1.083	9.399		p=0.949 (CS+ hab vs CS- hab)									2b	ARCHT	2	1.8333	65.1667	6.6667
		CS+ hab	7	5.324	4.774	3.772	1.75	8.79		p<0.001 (CS+ rec vs CS- rec)									2b	ARCHT	1.6667	0	27.8333	2.3333
		CS+ rec	7	43.399	17.348	42.833	29.518	52.25		p=0.955 (CS- hab vs CS- rec)									2b	ARCHT	14.0317	3.01	78.9633	5.6533
										p<0.001 (CS+ hab vs CS+ rec)									2b	ARCHT	0	2.7783	41.8	0
	freezing (%) ArchT (protocol 2b) hab=habituation; rec=recall	CS- hab	11	4.087	7.478	2.167	1.042	3.128	Two way anova repeated measures with multiple comparisons (Holm-Sidak method)	p<0.001 (interaction)
		CS- rec	11	5.787	6.269	5.653	1.542	7.792		p=0.924 (CS+ hab vs CS- hab)
		CS+ hab	11	3.654	4.064	2	1.042	5.792		p<0.001 (CS+ rec vs CS- rec)
		CS+ rec	11	54.069	17.867	58.333	35.825	69.042		p=0.707 (CS- hab vs CS- rec)
										p<0.001 (CS+ hab vs CS+ rec)
J	CS+ freezing (%) during recall	GFP 1b	12	51.085	25.147	49.912	25.583	74.083	t-test	p=0.005
		ArchT 1b	13	24.335	17.665	18.5	8	36.917	rank sum test	p=0.01
		GFP 2b	7	43.399	17.348	42.833	29.518	52.25	t-test	p=0.230
		ArchT 2b	11	54.069	17.867	58.333	35.825	69.042	rank sum test	p=0.221
