# Supplementary material for: The integration of Gaussian noise by long-range amygdala inputs in frontal circuit promotes fear learning in mice
Source: eLife. 2020 Nov 30;9:e62594. doi: 10.7554/eLife.62594 (PMC7704104; doi:10.7554/eLife.62594)
Supplement: Figure 4—source data 1. [file elife-62594-fig4-data1.xlsx]

## Sheet: Main Figures
fig.	variable /units	group	mice	mean	Std dev	median	0.25	0.75	test	p -value			freezing response (%)					frequency of caclcium transient (per ROI; normalized to baseline)
4C	freezing (%); hab=habituation; rec=recall	CS- hab	10	4.799	4.077	4.107	1	7.58	Two way anova repeated measures with multiple comparisons (Holm-Sidak method)	p=0.007 (interaction)			habituation		recall		learning	fear conditionning
		CS- rec	10	7.304	4.783	8.958	2.83	10.3		p=0.742 (CS+ hab vs CS- hab)		protocol	CS+	CS-	CS+	CS-		CS+1	CS-1	CS+2	CS-2	CS+3	CS-3	CS+4	CS-4	CS+5	CS-5	Δcumul ΔF/F0
		CS+ hab	10	3.199	3.131	3.153	0	5.17		p<0.001 (CS+ rec vs CS- rec)		1	0.4167	0.3333	40	3.1667	yes	0.7533	1.3944	0.8855	1.0657	1.3612	0.7606	0.8458	1.3239	0.5815	0.9296	0.065
		CS+ rec	10	29.24	20.241	25.733	12.5	44.3		p=0.613 (CS- hab vs CS- rec)		1	9.1667	7.5833	31.1667	8.1667	yes	1.4993	3.6552	3.4828	3.1724	2.8621	3.4483	3.3793	3.8966	3.069	3.8966	0.0238
										p<0.001 (CS+ hab vs CS+ rec)		1	10	5.1667	57.3333	0	yes	1.2721	1.5795	1.3569	1.6007	1.4205	1.4417	1.2721	1.3675	1.5689	0.6784	0.1611
	freezing (%) CS+ during recall	learning+	5	46.24	11.619	44.333	37.8	57.6	t-test	p<0.001		1	12.5	0	44.3333	5.1667	yes	0.9333	2.1333	3.3333	4.8	2.1333	1.4667	0.8	3.0667	1.6	0.9333	0.1473
		learning-	5	12.25	8.028	12.5	6.98	19.2				2	5.89	10.0917	58.37	0	yes	0.7196	1.4103	1.4872	1.4615	2.359	1.9744	2.1538	1.6154	2.1795	1.8718	0.1076
4F	frequency of events normalized to baseline	CS+ learning+	5	1.723	0.733	1.76	1.22	2.05	Two way anova repeated measures with multiple comparisons (Holm-Sidak method)	p=0.015 (learn.+ vs learn.-)
		CS- learning+	5	2.071	0.999	1.667	1.4	2.76		p=0.081 (CS+ vs CS-)		1	10.3333	12.0833	0.4167	0.3333	no	0.8	1.2	0.6	0.8	1.2	0.2	0	0.2	0	0	-0.014
		CS+ learning-	5	0.616	0.184	0.692	0.48	0.74				1	8.75	4.6667	9.1667	7.5833	no	0.5714	1	0.1429	1.2143	0.4286	1	0.4286	2.2143	0.1429	0.8571	0.0348
		CS- learning-	5	0.776	0.295	0.72	0.58	0.92				1	2.8333	1	12.5	0	no	0.8156	0.773	0.8582	0.7872	0.8511	0.9078	0.6738	0.766	0.8014	0.7872	0.0256
	frequency of events normalized to baseline; w/ US(+) vs w/o US(-)	learning+ US-	5	1.036	0.339	0.933	0.75	1.33	Two way anova repeated measures with multiple comparisons (Holm-Sidak method)	p=0.042 (interaction)		2	13.1483	3.5183	20.2983	4.435	no	0.781	0.7429	0.7429	0.5143	0.9143	0.8762	0.7429	0.5143	0.4381	0.4381	0.0207
		learning+ US+	5	1.97	0.948	1.835	1.27	2.55		p=0.01 (learn+, US+ vs US-)		2	0	3.5467	18.8417	3.1383	no	0.4199	0.6769	0.5741	0.9169	0.6255	0.7541	0.8569	0.7798	0.9854	0.4713	0.012
		learning- US-	5	0.742	0.115	0.79	0.68	0.81		p=0.845 (learn-, US+ vs US-)
		learning- US+	5	0.688	0.165	0.729	0.56	0.81
	frequency of events normalized to baseline; CS+1 vs CS-1	CS+ learning+	5	1.036	0.339	0.933	0.75	1.33	Two way anova repeated measures with multiple comparisons (Holm-Sidak method)	p=0.036 (interaction)
		CS- learning+	5	2.035	0.954	1.58	1.41	2.51		p=0.003 (learn+, CS+1 vs CS-1)
		CS+ learning-	5	0.678	0.175	0.781	0.53	0.8		p=0.425 (learn-, CS+1 vs CS-1)
		CS- learning-	5	0.879	0.217	0.773	0.73	1.05
4G	cumulative ΔF/F0	CS+	10	0.213	0.201	0.128	0.08	0.29	paired t-test	p=0.012
		CS-	10	0.273	0.244	0.204	0.12	0.3	rank sum test	p=0.006
	cumulative ΔF/F0 (CS-) - (CS+)	learning+	5	0.101	0.0571	0.108	0.05	0.15	paired t-test	p=0.013
		learning-	5	0.016	0.0186	0.0207	0.01	0.03	rank sum test	p=0.032
