# Supplementary material for: The integration of Gaussian noise by long-range amygdala inputs in frontal circuit promotes fear learning in mice
Source: eLife. 2020 Nov 30;9:e62594. doi: 10.7554/eLife.62594 (PMC7704104; doi:10.7554/eLife.62594)
Supplement: Figure 5—figure supplement 2—source data 1. [file elife-62594-fig5-figsupp2-data1.xlsx]

## Sheet: Sup Figures
fig.	variable /units	group	cells	mean	Std dev	median	0.25	0.75	test	p -value
A	cVm change (mV)	WGN-	22	27.62	19.741	25.888	16.2	36.3	t-test	p=0.251
	canula (+)	WGN+	13	18.84	24.246	19.955	5.79	42.6	Mann-Whitney rank sum test	p=0.322
	vs non caunla(-)	8kHz-	22	1.16	18.145	1.748	-13	11.7	t-test	p=0.091
		8kHz+	9	-10	8.845	-11.41	-15	-8.17	Mann-Whitney rank sum test	p=0.086
C	cVm change (mV)	WGN	11	18.9	23.505	19.955	11.5	37.3	One wayanova	p<0.001
	time point 1	BLA	11	-0.89	8.132	-0.189	-6.1	4.73	repeated measures	p=0.002 (WGN vs BLA)
		WGN+BLA	11	43.92	21.295	54.172	22.9	62.6	with multiple comparisons	p<0.001 (WGN vs WGN+BLA)
									(Holm-Sidak method)	p<0.001 (BLA vs WGN+BLA)
	cVm change (mV)	WGN	11	22.43	27.812	27.535	5.23	35	One wayanova	p=0.002
	time point 2	BLA	11	-0.46	11.482	-0.125	-2.4	2.36	repeated measures	p=0.044 (WGN vs BLA)
		WGN+BLA	11	48.54	43.225	34.954	25.1	64.2	with multiple comparisons	p=0.037 (WGN vs WGN+BLA)
									(Holm-Sidak method)	p<0.001 (BLA vs WGN+BLA)
E	cVm change (mV)	8kHz	8	-9.7	9.409	-10.29	-16	-7.55	One wayanova	p=0.002
	time point 1	BLA	8	6.866	4.765	7.155	2.56	11.2	repeated measures	p<0.001 (8kHz vs BLA)
		8kHz+BLA	8	16.67	8.928	18.567	14.7	22.1	with multiple comparisons	p<0.001 (8kHz vs 8kHz+BLA)
									(Holm-Sidak method)	p=0.023 (BLA vs 8kHz+BLA)
	cVm change (mV)	8kHz	8	-10.9	15.645	-11.36	-25	-0.03	One wayanova	p=0.006
	time point 2	BLA	8	2.324	3.503	3.37	-0.5	4.68	repeated measures	p=0.064 (8kHz vs BLA)
		8kHz+BLA	8	14.85	18.769	12.97	-2.9	28.5	with multiple comparisons	p=0.002 (8kHz vs 8kHz+BLA)
									(Holm-Sidak method)	p=0.078 (BLA vs 8kHz+BLA)
F	cVm change (mV)	control	13	39.1	22.593	48.968	15.4	61	t-test	p<0.001
	WGN+BLA time point 1	dAP5	7	-26.7	17.794	-29.68	-33	-24.3	Mann-Whitney rank sum test	p<0.001
	cVm change (mV)	control	13	46.38	41.988	34.954	20.7	68.2	t-test	p=0.003
	WGN+BLA time point 2	dAP5	7	-9.44	15.34	-2.961	-21	-2.25	Mann-Whitney rank sum test	p<0.001
