# Supplementary material for: The integration of Gaussian noise by long-range amygdala inputs in frontal circuit promotes fear learning in mice
Source: eLife. 2020 Nov 30;9:e62594. doi: 10.7554/eLife.62594 (PMC7704104; doi:10.7554/eLife.62594)
Supplement: Figure 5—source data 1. [file elife-62594-fig5-data1.xlsx]

## Sheet: Main Figures
fig.	variable /units	group	cells	mean	Std dev	median	0.25	0.75	test	p -value		cVm change (mV) time 1					cVm change (mV) time 2
5H	cVm change (Vm) WGN	observed	11	43.92	21.295				paired t-test	p=0.002		WGN	BLA	WGN+BLA			WGN	BLA	WGN+BLA
		expected	11	18.01	29.395									observed	expected				observed	expected
	cVm change (Vm) 8kHz	observed	8	16.67	8.928				paired t-test	p<0.001		17.5973	0.1686	60.2772	17.7659		27.5353	-1.3544	71.1818	26.1809
		expected	8	-2.84	9.271							41.4944	10.0485	64.1182	51.5429		-32.738	9.1464	41.5688	-23.5916
5I	observed cVm change (mV) time 1	WGN	11	43.92	21.295	18.567	14.7	22.1	t-test	p=0.003		10.7615	-5.1543	12.2637	5.6072		20.9189	-18.5807	5.5965	2.3382
		8kHz	8	16.67	8.928	54.172	22.9	62.6	rank sum test	p=0.035		24.2459	12.6072	63.3367	36.8531		76.3651	22.6131	43.1643	98.9782
	observed cVm change (mV) time 2	WGN	11	48.54	43.225	34.954	25.1	64.2	t-test	p=0.056		-13.2546	-0.0729	13.5522	-13.3275		-4.4196	-0.1254	25.5622	-4.545
		8kHz	8	14.85	18.769	12.97	-2.9	28.5	rank sum test	p=0.035		24.5204	-5.5917	23.8243	18.9287		24.7516	2.412	33.4452	27.1636
												-27.1049	-15.283	22.5856	-42.3879		0.0022	-18.8485	7.9924	-18.8463
												19.9549	-6.3047	54.8836	13.6502		35.1763	2.1905	90.3924	37.3668
												50.1869	6.2523	54.1724	56.4392		28.9601	1.7649	155.111	30.725
												13.6384	-6.3129	48.968	7.3255		34.5415	-2.6779	34.954	31.8636
												45.8818	-0.189	65.0865	45.6928		35.5925	-1.5529	24.9548	34.0396
												cVm change (mV) time 1					cVm change (mV) time 2
												8kHz	BLA	WGN+BLA			8kHz	BLA	WGN+BLA
														observed	expected				observed	expected
												10.5009	3.7479	25.6175	14.2488		14.2531	3.6831	46.4482	17.9362
												-14.7974	12.1056	19.25	-2.6918		-27.98	-0.9769	-4.8516	-28.9569
												-8.7951	12.4868	14.6416	3.6917		-3.803	5.2597	16.0781	1.4567
												-20.1317	10.2	14.8502	-9.9317		-23.8532	6.9733	23.6958	-16.8799
												-11.4082	1.3673	24.234	-10.0409		-26.6902	-0.0071333	33.3711	-26.6973
												-9.1766	0.7131	-3.1746	-8.4635		-4.0596	-3.4918	-3.3067	-7.5514
												-17.5255	4.8352	20.0315	-12.6903		-18.6634	4.097	9.8618	-14.5664
												-6.3021	9.4758	17.8834	3.1737		3.7397	3.0563	-2.5257	6.796
