# Supplementary material for: The integration of Gaussian noise by long-range amygdala inputs in frontal circuit promotes fear learning in mice
Source: eLife. 2020 Nov 30;9:e62594. doi: 10.7554/eLife.62594 (PMC7704104; doi:10.7554/eLife.62594)
Supplement: Figure 6—source data 1. [file elife-62594-fig6-data1.xlsx]

## Sheet: Main Figures
fig.	variable /units	group	mice	mean	Std dev	median	0.25	0.75	test	p -value				habituation		recall
6E	Learning+ (total mice) protocol 1b	GFP+	7 (8)						pearson χ² test (χ²=7.77)	p=0.0053		protocol	genotype	CS+	CS-	CS+	CS-
		ArchT+	2 (7)									1b	GFP	6.8333	12.5	62	5.1667
	Learning+ (total mice) protocol 2b	GFP+	7(9)						pearson χ² test (χ²=2.01)	p=0.1469		1b	GFP	18	17.5	75.5	4
		ArchT+	4(9)									1b	GFP	3.5	2	49.6667	1.6667
6F	freezing (%) GFP (all protocols) hab=habituation; rec=recall	CS- hab	20	5.143	5.26	4.216	0.35	7.617	Two way anova repeated measures with multiple comparisons (Holm-Sidak method)	p<0.001 (interaction)		1b	GFP	0	1	48.3333	4.8333
		CS- rec	20	3.794	2.912	3.212	1.853	5.486		p=0.970 (CS+ hab vs CS- hab)		1b	GFP	15	6.5	58	10.6667
		CS+ hab	20	5.021	4.66	3.717	2.048	6.568		p<0.001 (CS+ rec vs CS- rec)		1b	GFP	3.8333	0	54.1667	8.8333
		CS+ rec	20	43.304	18.942	40.386	31.702	53.948		p=0.677 (CS- hab vs CS- rec)		1b	GFP	3.5	0	88	5.3333
										p<0.001 (CS+ hab vs CS+ rec)		1b	GFP	3.6	0.7	12	2.3333
	freezing (%) ArchT (all protocols) hab=habituation; rec=recall	CS- hab	19	8.314	5.395	7.23	5.471	11.833	Two way anova repeated measures with multiple comparisons (Holm-Sidak method)	p<0.001 (interaction)
		CS- rec	19	8.165	9.948	5.785	0.426	11.542		p=0.743 (CS+ hab vs CS- hab)		1b	ARCHT	11.8333	10.3333	25.1667	10.1667
		CS+ hab	19	9.599	7.818	7.85	2.865	15.478		p<0.001 (CS+ rec vs CS- rec)		1b	ARCHT	21	12.3333	48.1667	6.3333
		CS+ rec	19	35.226	19.762	29.333	23.403	43.35		p=0.97 (CS- hab vs CS- rec)		1b	ARCHT	16.5	16.8333	34.5	39.8333
										p<0.001 (CS+ hab vs CS+ rec)		1b	ARCHT	6	7	41	14.8333
6G	CS+ freezing (%) during recall	GFP 1b	8	55.958	22.305	56.083	49	68.75	t-test	p=0.037		1b	ARCHT	7.5	5.5	42.5	7.8333
		ArchT 1b	7	34.905	9.337	34.5	26.208	42.125	rank sum test	p=0.014		1b	ARCHT	26	9	29.3333	4.8333
		GFP 2b	12	34.867	10.441	36.546	28.217	40.386	t-test	p=0.944		1b	ARCHT	20	0.5	23.6667	12
		ArchT 2b	12	35.413	24.319	27.074	15.668	49.395	rank sum test	p=0.665
												2b	GFP	4.1183	3.765	35.1933	1.895
												2b	GFP	5.145	14.6983	19.2483	5.6383
												2b	GFP	2.7833	1.965	25.8633	0
												2b	GFP	9.8017	0	39.4383	6.5167
												2b	GFP	2.0967	9.3717	45.2283	1.8783
												2b	GFP	3.98	7.2983	37.8983	5.3133
												2b	GFP	7.3367	5.955	39.4017	2.4233
												2b	GFP	1.745	0	17.6667	0
												2b	GFP	6.3033	7.9367	53.73	1.8267
												2b	GFP	0.8333	4.6667	32.8333	1.8833
												2b	GFP	2	7	41.3333	5.6667
												2b	GFP	0	0	30.57	0
												2b	ARCHT	0	9.5267	11.1883	1.7067
												2b	ARCHT	0	17.5667	28.7983	7.455
												2b	ARCHT	1.7583	7.23	23.315	1.7033
												2b	ARCHT	7.4017	0	8.61	0
												2b	ARCHT	12.4117	2.1933	18.96	0
												2b	ARCHT	0	2.18	12.375	5.785
												2b	ARCHT	18.555	9.955	25.35	0
												2b	ARCHT	3.43	14.5817	55.1567	0
												2b	ARCHT	2.6767	5.9533	79.53	17.3617
												2b	ARCHT	7.85	5.5117	43.6333	3.9017
												2b	ARCHT	10.9983	5.4617	76.1817	21.3933
												2b	ARCHT	8.4717	16.3067	41.855	0
